# Supplementary material for: Dynamic Adaptive Changes of the Ileum Transposed to the Proximal Small Intestine in Rats
Source: Springer Nature journal article supplement (doi:10.1007/s11695-019-03858-9), 2019-04-29
Supplement: MOESM3 [file 16684776]

**Supplementary table 1. Primers for qRT-PCR of key genes**

| Gene | Forward primer | Reverse primer |
| --- | --- | --- |
| *Gapdh* | ATG ACT CTA CCC ACG GCA AG | TAC TCA GCA CCA GCA TCA CC |
| *G6pc* | GTG TCC GTG ATC GCA GAC C | GAC GAG GTT GAG CCA GTC TC |
| *Slc2a2* | GTC CAG AAA GCC CCA GAT ACC | TGC CCC TTA GTC TTT TCA AGC T |
| *Hk3* | CTC CAG GCT GGT GTC AGT GA | CTC CGA TTG CAA AAA GGT GAC T |
| *Ccl5* | CCA GAG AAG AAG TGG GTT CA | AGC AAG CAA TGA CAG GAA AG |
| *Il1b* | CAC CTC TCA AGC AGA GCA CAG | GGG TTC CAT GGT GAA GTC AAC |
| *Jak3* | GGA GAG TGA GGC GCA TGT GAA GAT | CAG ATT GGC GGG AGA AGA TGT TGT |
| *Stat1* | TGA GTT CCG ACA CCT GCA ACT GAA | AGG TGG TCT CAA GGT CAA TCA CCA |
| *Tlr2* | TCT TGA TGG CTG TGA TAG G | CCG AGG GAA TAG AGG TGA |
| *Slc27a2* | TTT CAG CCA GCC AGT TTT G | TCT CCT CGT AAG CCA TTT CC |
| *Acadm* | ACC AAG ACG GCT ACA ATG ATG | TGA GGC AGA AGC TAA GGT TGA |
| *Col1a1* | GCT CCT CTT AGG GGC CAC T | CCA CGT CTC ACC ATT GGG G |
